# Supplementary material for: Influence of ab initio derived site-dependent hopping parameters on electronic transport in graphene nanoribbons
Source: Royal Society of Chemistry journal article supplement (doi:10.1039/d3cp04080a), 2023-11-21
Supplement: d3cp04080a1.pdf [file d3cp04080a1.pdf]

## Supplementary Information

### Influence of *ab initio* derived site-dependent hopping parameters on electronic transport in graphene nanoribbons

Masoumeh Davoudiniya<sup>1</sup>, Bo Yang<sup>1,2</sup> and Biplab Sanyal<sup>1</sup>

<sup>1</sup> Department of Physics and Astronomy, Uppsala University, Box 516,  
75120 Uppsala, Sweden

<sup>2</sup> Present address: School of Science, Shandong Jianzhu University, Jinan 250101,  
China

Table S1 The values of bond lengths (Å) and hopping parameters (eV) of N<sub>A</sub>-AGNRs.

(a) 4-AGNR

|   | Zigzag bond |                   | Parallel bond |                   |
|---|-------------|-------------------|---------------|-------------------|
|   | Bond length | Hopping parameter | Bond length   | Hopping parameter |
| 1 | 1.42        | -2.82             | 1.44          | -2.75             |
| 2 | 1.42        | -2.84             | 1.43          | -2.87             |
| 3 | 1.43        | -2.84             | 1.43          | -2.83             |
| 4 | 1.43        | -2.85             | 1.37          | -2.91             |
| 5 | 1.42        | -2.84             |               |                   |
| 6 | 1.42        | -2.84             |               |                   |
| 7 | 1.42        | -2.82             |               |                   |

(b) 8-AGNR

|   | Zigzag bond |                   | Parallel bond |                   |
|---|-------------|-------------------|---------------|-------------------|
|   | Bond length | Hopping parameter | Bond length   | Hopping parameter |
| 1 | 1.42        | -2.84             | 1.44          | -2.74             |
| 2 | 1.42        | -2.87             | 1.42          | -2.88             |
| 3 | 1.43        | -2.84             | 1.43          | -2.86             |
| 4 | 1.43        | -2.87             | 1.43          | -2.86             |
| 5 | 1.42        | -2.88             | 1.43          | -2.88             |
| 6 | 1.43        | -2.86             | 1.43          | -2.87             |
| 7 | 1.43        | -2.87             | 1.43          | -2.83             |

|    |      |       |      |       |
|----|------|-------|------|-------|
| 8  | 1.42 | -2.88 | 1.37 | -2.92 |
| 9  | 1.43 | -2.87 |      |       |
| 10 | 1.43 | -2.86 |      |       |
| 11 | 1.42 | -2.88 |      |       |
| 12 | 1.43 | -2.87 |      |       |
| 13 | 1.43 | -2.84 |      |       |
| 14 | 1.42 | -2.87 |      |       |
| 15 | 1.42 | -2.87 |      |       |

12-AGNR

|    | Zigzag bond |                   |    | Zigzag bond |                   |    | Parallel bond |                   |
|----|-------------|-------------------|----|-------------|-------------------|----|---------------|-------------------|
|    | Bond length | Hopping parameter |    | Bond length | Hopping parameter |    | Bond length   | Hopping parameter |
| 1  | 1.41        | -2.83             | 13 | 1.43        | -2.87             | 1  | 1.44          | -2.74             |
| 2  | 1.42        | -2.87             | 14 | 1.43        | -2.87             | 2  | 1.42          | -2.88             |
| 3  | 1.43        | -2.84             | 15 | 1.43        | -2.86             | 3  | 1.43          | -2.86             |
| 4  | 1.42        | -2.87             | 16 | 1.42        | -2.87             | 4  | 1.43          | -2.85             |
| 5  | 1.42        | -2.88             | 17 | 1.42        | -2.87             | 5  | 1.43          | -2.86             |
| 6  | 1.43        | -2.86             | 18 | 1.43        | -2.86             | 6  | 1.43          | -2.86             |
| 7  | 1.43        | -2.87             | 19 | 1.42        | -2.88             | 7  | 1.43          | -2.85             |
| 8  | 1.42        | -2.87             | 20 | 1.42        | -2.87             | 8  | 1.43          | -2.86             |
| 9  | 1.43        | -2.86             | 21 | 1.43        | -2.84             | 9  | 1.43          | -2.87             |
| 10 | 1.43        | -2.87             | 22 | 1.42        | -2.87             | 10 | 1.43          | -2.84             |
| 11 | 1.43        | -2.87             | 23 | 1.41        | -2.83             | 11 | 1.43          | -2.84             |
| 12 | 1.43        | -2.86             |    |             |                   | 12 | 1.37          | -2.90             |

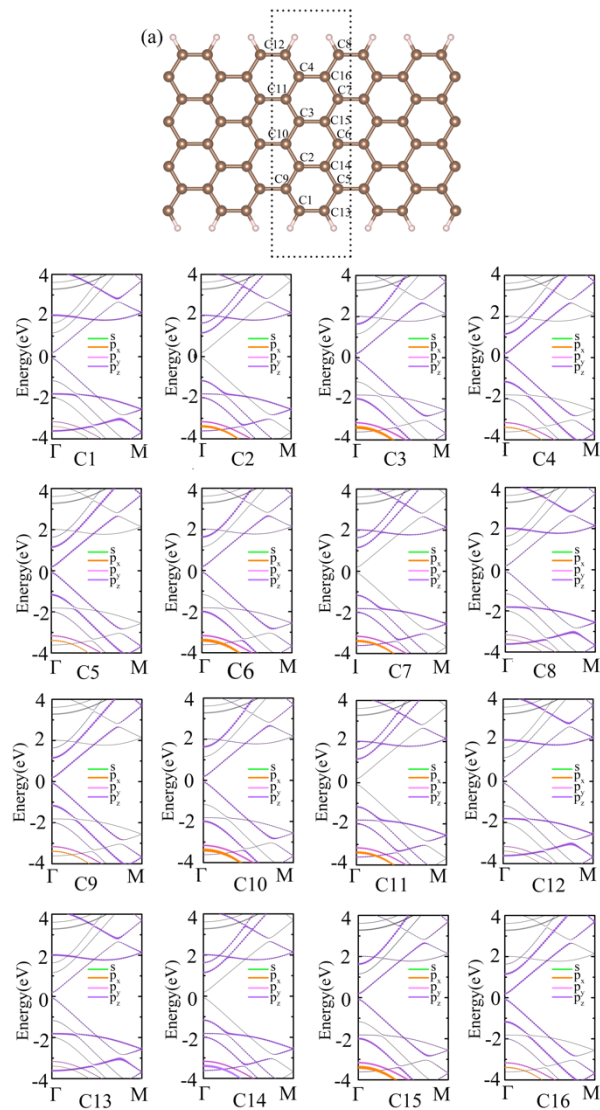

Fig. S1 The structures and fat bands of 4-AGNR. The Fermi level is set to zero.

Fig. S2 (a-b) The isosurface contours of MLWF of C1 and C3 from top and side view, respectively. It can be seen very clearly that the MLWFs is localized on a carbon atom.

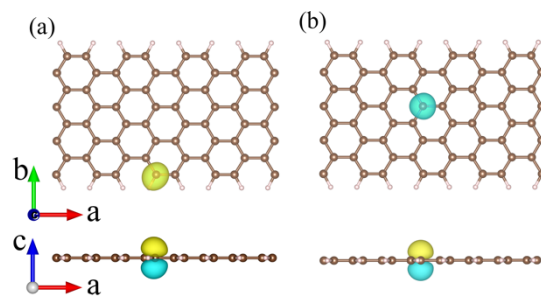

The isosurface contours show the characteristics of  $p_z$  orbital.

Table S2 The values of bond lengths (Å) and hopping parameters (eV) of N<sub>Z</sub>-ZGNRs.

(a) 4-ZGNR

|   | Bond length | Hopping parameter |   | Bond length | Hopping parameter |
|---|-------------|-------------------|---|-------------|-------------------|
| 1 | 1.41        | -2.85             | 5 | 1.42        | -2.86             |
| 2 | 1.45        | -2.70             | 6 | 1.45        | -2.70             |
| 3 | 1.42        | -2.86             | 7 | 1.41        | -2.87             |
| 4 | 1.44        | -2.76             |   |             |                   |

(b) 8-ZGNR

|   | Bond length | Hopping parameter |    | Bond length | Hopping parameter |
|---|-------------|-------------------|----|-------------|-------------------|
| 1 | 1.41        | -2.81             | 9  | 1.42        | -2.87             |
| 2 | 1.46        | -2.77             | 10 | 1.43        | -2.85             |
| 3 | 1.42        | -2.87             | 11 | 1.42        | -2.87             |
| 4 | 1.43        | -2.84             | 12 | 1.43        | -2.84             |
| 5 | 1.42        | -2.87             | 13 | 1.42        | -2.87             |
| 6 | 1.43        | -2.85             | 14 | 1.45        | -2.77             |
| 7 | 1.42        | -2.87             | 15 | 1.41        | -2.80             |
| 8 | 1.43        | -2.85             |    |             |                   |

(c) 12-ZGNR

|   | Bond length | Hopping parameter |    | Bond length | Hopping parameter |
|---|-------------|-------------------|----|-------------|-------------------|
| 1 | 1.41        | -2.79             | 13 | 1.42        | -2.86             |
| 2 | 1.45        | -2.77             | 14 | 1.43        | -2.86             |
| 3 | 1.42        | -2.86             | 15 | 1.42        | -2.86             |
| 4 | 1.43        | -2.84             | 16 | 1.43        | -2.86             |
| 5 | 1.42        | -2.86             | 17 | 1.42        | -2.86             |
| 6 | 1.43        | -2.85             | 18 | 1.43        | -2.85             |
| 7 | 1.42        | -2.86             | 19 | 1.42        | -2.86             |
| 8 | 1.43        | -2.86             | 20 | 1.43        | -2.84             |

|    |      |       |    |      |       |
|----|------|-------|----|------|-------|
| 9  | 1.43 | -2.86 | 21 | 1.42 | -2.86 |
| 10 | 1.43 | -2.86 | 22 | 1.45 | -2.77 |
| 11 | 1.42 | -2.86 | 23 | 1.41 | -2.78 |
| 12 | 1.43 | -2.86 |    |      |       |
